# Supplementary material
Source: publisher site journal article supplement (https://www.spandidos-publications.com/7533/downloadSupplementary)

Figure S1. si-circ\_0072107-2 alleviated the hypertrophy of AC16 cells induced by isoproterenol. (A) Diagrammatic representation of si-circ\_0072107-2 sequence. (B) The expression of hsa\_circ\_0072107 in AC16 was quantified by reverse transcription-quantitative PCR. hsa\_circ\_0072107 knockdown (C) decreased the protein/DNA ratio, (D) reduced cell size (scale bars, 50  $\mu\text{m}$ ) and (E) lowered BNP and  $\beta$ -MHC protein levels. \* $P < 0.05$ ,  $n = 3$ . si, small interfering; ISO, cells treated with isoproterenol; ISO + si-NC, ISO treated cells transfected with negative siRNA (si-NC); ISO + si-circ\_0072107, ISO treated cells transfected with siRNA targeting hsa\_circ\_0072107 (si-circ\_0072107-2).

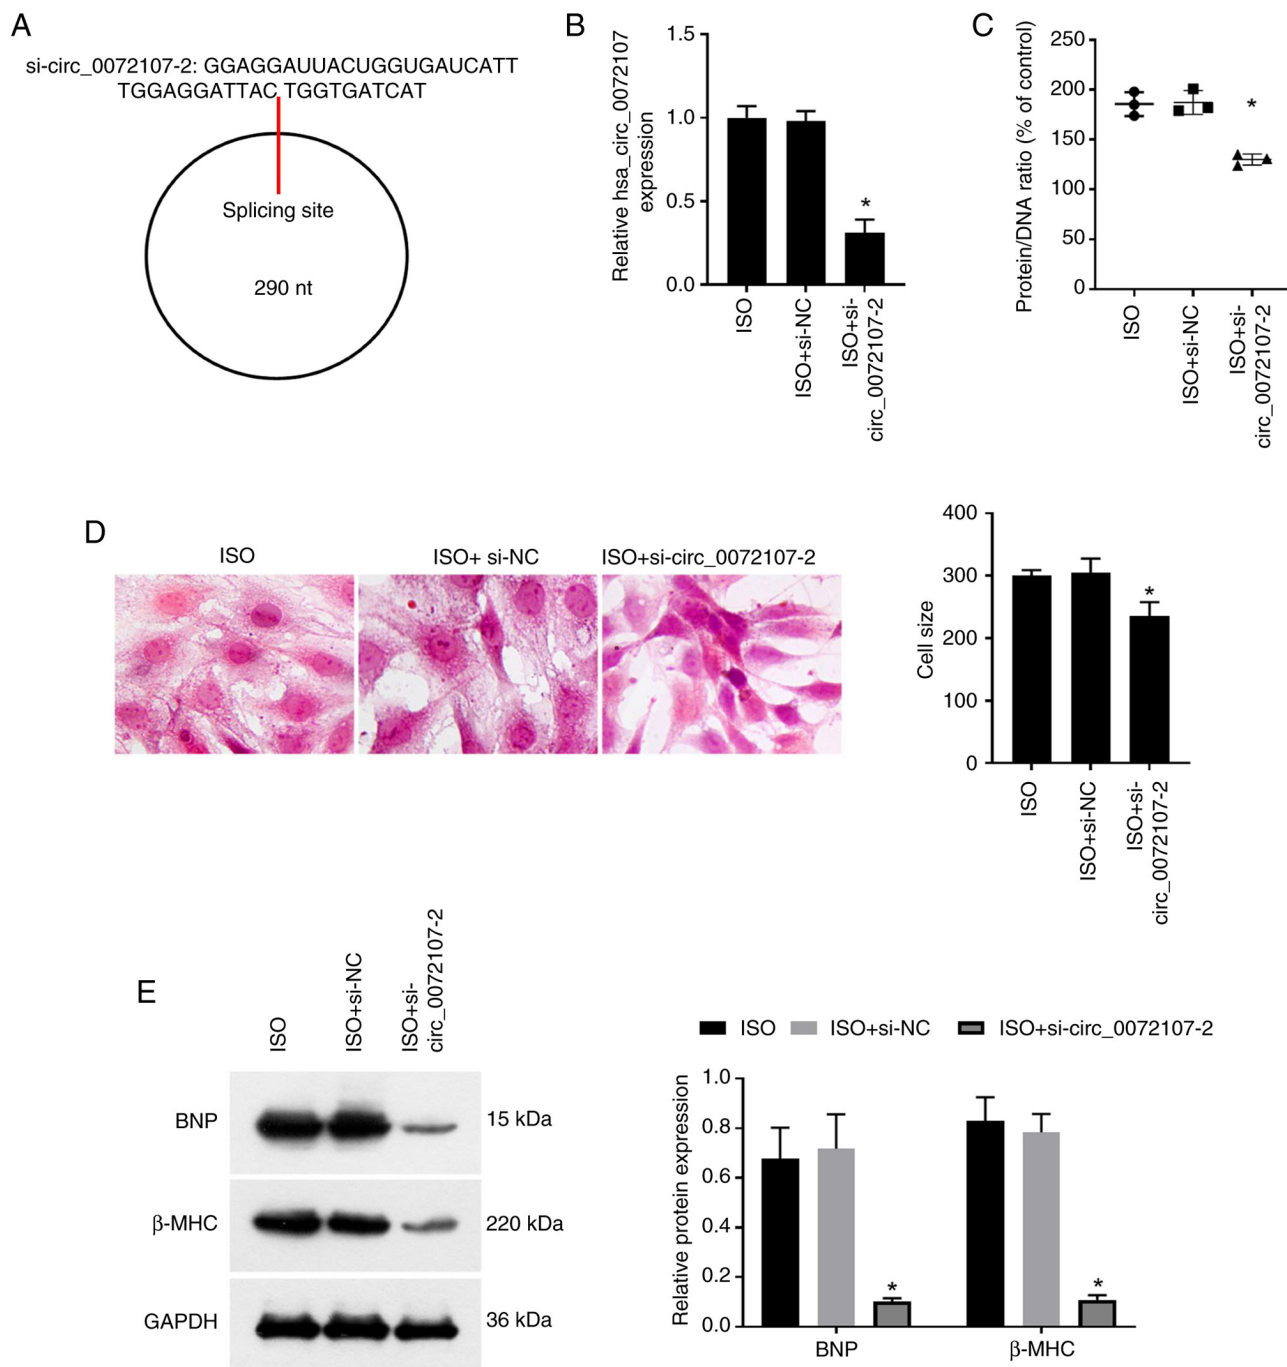

Supplement: Supplementary file 1 [file downloadSupplementary]
